# Supplementary material for: The crystal structure of the RhoA–AKAP-Lbc DH–PH domain complex
Source: PubMed Central journal article supplement (PMC4232260; doi:10.1042/bj20140606), 2014-11-14
Supplement: bj4640231ntsadd.pdf [file bj4640231ntsadd.pdf]

# The Crystal Structure of the RhoA : AKAP-Lbc DH-PH Domain Complex

## Supplementary Material

### Contents

|                                                                 |   |
|-----------------------------------------------------------------|---|
| Protein sequences of the constructs used.....                   | 2 |
| RhoA.....                                                       | 2 |
| AKAP-Lbc DH-PH domain .....                                     | 2 |
| AKAP-Lbc DH domain .....                                        | 2 |
| Figure S1 - Sequence alignment of selected RhoGEF domains ..... | 3 |

## **Protein sequences of the constructs used**

### **RhoA**

SMAAIRKKLVIVGDGACGKTCLLIVFSKDQFPEVYVPTVFENYVADIEVDGKQVELALWDTAGQEDYDRLRPLSYPDTD  
VILMCFSIDSPDSLENIPEKWTPEVKHFPCPNVPIILVGNKKDLRNDHTRRELAKMKQEPVKPEEGRDMANRIGAFGYM  
ECSAKTKDGVREVFEMATRAALQARRG

### **AKAP-Lbc DH-PH domain**

SMSKQLEAESWSRIIDSKFLKQQKKDVVKRQEVIYELMQTEFHVRTLKIMSGVYSQGMMADLLFEQQMVEKLPCL  
DELISIHQQFFQRILERKKESLVDKSEKNFLIKRIGDVLVNQFSGENAERLKKTYGKFCGQHNQSVNYFKDLYAKDKRFQA  
FVKKKMSSSVVRRLGIPPECILLVTQRITKYPVLFQRILQCTKDNEVEQEDLAQSLSLVKDVIGAVDSKVASYEKKVRLNEIYT  
KTDSKSIMRMKSGQMFAKEDLKRKKLVRDGSVFLKNAAGRLKEVQAVLLTDILVFLQEKDQKYIFASLDQKSTVISLKKLI  
VREVAHEEKGLFLISMGMTDPEMVEVHASSKEERNSWIQIIQDTINTLNRD

### **AKAP-Lbc DH domain**

SMEAESWSRIIDSKFLKQQKKDVVKRQEVIYELMQTEFHVRTLKIMSGVYSQGMMADLLFEQQMVEKLPCLDELISI  
HSQFFQRILERKKESLVDKSEKNFLIKRIGDVLVNQFSGENAERLKKTYGKFCGQHNQSVNYFKDLYAKDKRFQAFVKKK  
MSSSVVRRLGIPPECILLVTQRITKYPVLFQRILQCTKDNEVEQEDLAQSLSLVKDVIGAVDSKVASYEKKVRLNEIYTK

**Figure S1 - Sequence alignment of selected RhoGEF domains**

```

p115-RhoGEF -----DEGEPGRSGLELEPE-EPPGW 413
PDZ-RhoGEF -----LLEDDLGLSDLEPEPDAQNW 716
LARG -----GESQSEDEQFENDLETDPN 769
AKAP-Lbc -----SKQLEAESW 1980
      . : : . *

p115-RhoGEF RELVPPDTLHSLPKSQVKRQEVISELLVTEAAHVRMLRVLHDLFFQPMAECLFFPLEELQ 473
PDZ-RhoGEF QHTVKGKDVVAGLTQREIDRQEVINELFVTEASHLRTLRLVLDLIFYQRMKKENLMPREELA 776
LARG QQLVRSREVLGLKPCIEIKRQEVINELFYTERAHVRTLKVLDQVFYQQRVSREGILSPSELR 829
AKAP-Lbc SRIIDSKFLKQKKDVVKRQEVIIYELMQTEFHVRTLKIMSGVYSQGMADLLFEQQMVE 2040
      . : . : : . * * * * * * * * * * * * * * * * * * * * * * * * * * * * * *

p115-RhoGEF NIFPSLDELIEVHSLFLDRMLKRRQES-----GYLIEEIGDVLARFDGAEGSWFQKI 526
PDZ-RhoGEF RLFPNLPELIEIHNSWCEAMKKLREE-----GPIIKEISDLMLARFDGPAREELQOV 828
LARG KIFSNLEDILQLHIGLNEQMKAVRKRNE-----TSVIDQIGEDLLTWFSGPGEKLLKHA 883
AKAP-Lbc KLFPCLEDELISIHQFFQRIILERKKESLVDKSEKNFLIKRIGDVLVNFSGENAEERLKKT 2100
      . : * * * * * * * * * * * * * * * * * * * * * * * * * * * * * *

p115-RhoGEF SSRFCSRQSFALQLKAKQRKDPFCAFVQEAESRPRCRRQLKDMIPTMQRLTKYPLL 586
PDZ-RhoGEF AAQFCSYQSIALLELIKTKQRKESRFQLFMQEAESHPCRRQLRDLIISEMQRLTKYPLL 888
LARG AATFCSNQPFALMIKSRQKDSRFQTFVQDAESNPLCRRQLKDLIPTQMQRRLTKYPLL 943
AKAP-Lbc YGKFCGQHNQSVNYFKDLYAKDKRFQAFVKKKMSSSVVRRLGIPCEILLVTQRITKYFVL 2160
      . * * . : : : : * * * * * * * * * * * * * * * * * * * * * * * *

p115-RhoGEF LQSIGQNTTEPT-EREKVELAAECCREILHHVNQAVRDMEDLLRLKDYQRRDLDSLHRQS 645
PDZ-RhoGEF LESIIKHTEGGTSEHEKLCRARDQCREILKYVNEAVKQ TENRHRLEGYQKRLDATALERA 948
LARG LDNIAKYTEWPT-EREKVKAADHCRQILNYVNQAVKEAENKQRLLEDYQRRDLTSSSLKLS 1002
AKAP-Lbc FQRILQCTKDNEVEQEDLAQSLSLVKDVI GAVDSKVASYEKKVRLNEIYTKTDSKSIMRM 2220
      : : * * * * * * * * * * * * * * * * * * * * * * * * * * * * * *

p115-RhoGEF SDPMLSEFNKLDITKKKLVHEGPLTWRVTKDKAVEVHVLLDDLLLLLQQRDERLLKSH 705
PDZ-RhoGEF SNPLAAEFKSLDLTTRKMIHEGPLTWRISKDKTLDLHVLLLEDLLVLLQKQDEKLLKCH 1008
LARG EYPNVEELRNLDLTKRKMHEGPLVWVNRDKTIDLYTLLEDLILVLLQKQDRLVLRCH 1062
AKAP-Lbc KS--GQMFakedLKRKKLVLDGVSFVFLKNAAGRLKEVQAVLLTDILVFLQEKDQKYIFASL 2278
      . : * * . : * * * * * * * * * * * * * * * * * * * * * * * *

p115-RhoGEF SRTLTPTPDGKTMLRPVLRRLTSAMTREVATDHKAFYVLFVTDQ-EAQIYELVAQTVSERK 764
PDZ-RhoGEF SKTAVGSSDSKQTFSPVLKLNVLIRSVATDKRAFFLICTSKLGPPIYELVALTSSDKN 1068
LARG SKILASTADSKHTFSPVIKLSVTLVLRQVATDNKALFVISMDSN-GAQIYELVAQTVSEKT 1121
AKAP-Lbc DQKST-----VISLKKLIVREVAHEEKGLFLISMGMT-DPEMVEVHASKEERN 2326
      . : . * * * * * * * * * * * * * * * * * * * * * * * * * * * * * *

p115-RhoGEF NWCALITETAGSLKVPAPASRPKPRPSPSTREPLLSSE-----NGNGGRET 812
PDZ-RhoGEF TWMEELLEAVRNATRHPGAAPMPVHPPPPGPREPAQQGPTPSRVELDDSDVHFHGEPEPEE 1128
LARG VWQDLICRMAASVKEQSTKPIPLPQSTPGEQDNDEEDPSKLKKEQHG--ISVTGLQSPDR 1179
AKAP-Lbc SWIQIIQDTINTLNRD
      * : : . .

```

| Protein     | Official Symbol | Genbank ID  |
|-------------|-----------------|-------------|
| p115-RhoGEF | ARHGEF1         | NP_945353.1 |
| PDZ-RhoGEF  | ARHGEF11        | NP_055599.1 |
| LARG        | ARHGEF12        | NP_056128.1 |
| AKAP-Lbc    | AKAP13          | NP_006729.4 |
